# Supplementary material for: Tracing the colonization history of the Indian Ocean scops-owls (Strigiformes: Otus) with further insight into the spatio-temporal origin of the Malagasy avifauna
Source: Springer Nature journal article supplement (doi:10.1186/1471-2148-8-197), 2008-01-01
Supplement: Additional file 1 [file 1471-2148-8-197-s1.pdf]

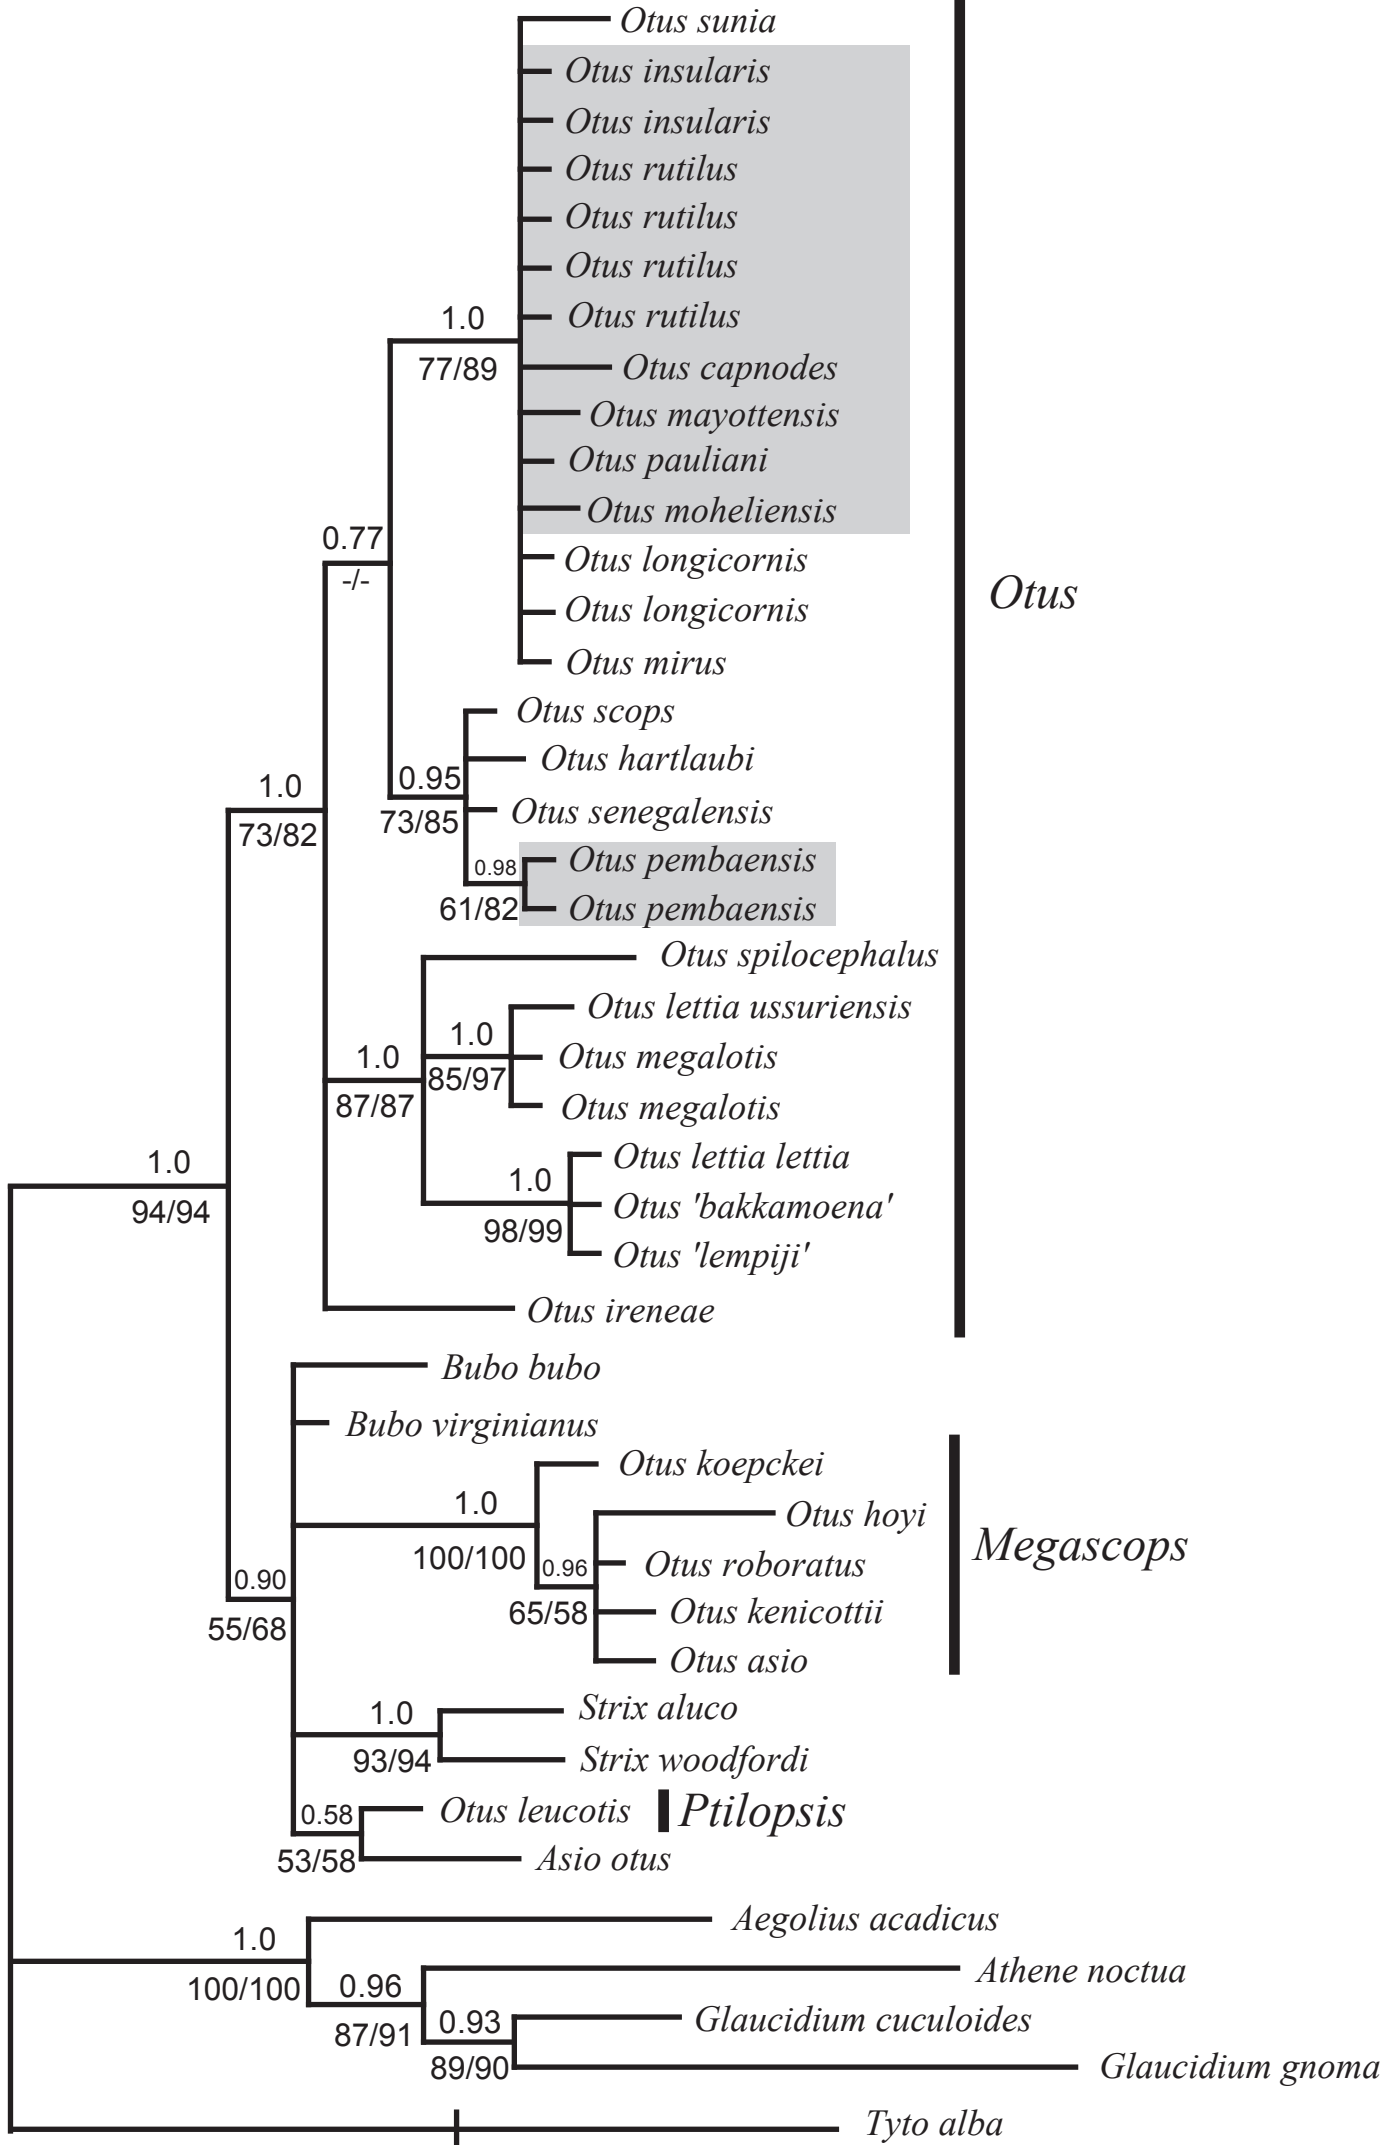

0.1
